# Supplementary material for: Patterns of disparity: age and socioeconomic differences in women's smoking and quitting outcomes in Great Britain
Source: Research Square preprint supplement (doi:10.21203/rs.3.rs-6818361/v1), 2025-06-11
Supplement: Supplementary file 1 [file 5badf3211075d7246d9ef09a.pdf]

## Supplementary File 1: model selection

**Table S1.** Model selection: AIC values for models with 3, 4, and 5 knots

|                               | AIC      |          |          |
|-------------------------------|----------|----------|----------|
|                               | 3 knots  | 4 knots  | 5 knots  |
| Smoking prevalence            |          |          |          |
| All women                     | 24524.74 | 24523.26 | 24518.06 |
| Women by social grade         | 23926.80 | 23927.89 | 23928.11 |
| All men                       | 27934.53 | 27936.25 | 27930.41 |
| Men by social grade           | 27364.54 | 27363.77 | 27359.70 |
| Quit attempt rate             |          |          |          |
| All women                     | 5632.81  | 5635.01  | 5635.31  |
| Women by social grade         | 5638.94  | 5643.44  | 5645.38  |
| All men                       | 6531.202 | 6530.439 | 6531.541 |
| Men by social grade           | 6528.703 | 6528.898 | 6528.730 |
| Success rate of quit attempts |          |          |          |
| All women                     | 1773.56  | 1774.28  | 1771.10  |
| Women by social grade         | 1772.74  | 1775.20  | 1773.71  |
| All men                       | 2062.517 | 2064.162 | 2066.865 |
| Men by social grade           | 2046.305 | 2044.683 | 2047.948 |
| Overall quit rate             |          |          |          |
| All women                     | 3733.97  | 3734.27  | 3727.19  |
| Women by social grade         | 3724.74  | 3726.77  | 3719.46  |
| All men                       | 4139.289 | 4136.484 | 4136.637 |
| Men by social grade           | 4119.747 | 4120.408 | 4123.208 |

AIC, Akaike Information Criterion.

Shaded cells indicate the best fitting model (the model with the lowest AIC or the simplest model within 2 AIC units).
