# Supplementary material for: Patterns of disparity: age and socioeconomic differences in women's smoking and quitting outcomes in Great Britain
Source: Research Square preprint supplement (doi:10.21203/rs.3.rs-6818361/v1), 2025-06-11
Supplement: Supplementary file 2 [file 875676489189cfb6b9a0d224.pdf]

**Supplementary File 2: additional results for women**

**Table S2.** Distribution of participants by age

|                              | Women          |                              |                                             | Women from more advantaged social grades (ABC1) |                              |                                             | Women from less advantaged social grades (C2DE) |                              |                                             |
|------------------------------|----------------|------------------------------|---------------------------------------------|-------------------------------------------------|------------------------------|---------------------------------------------|-------------------------------------------------|------------------------------|---------------------------------------------|
|                              | Total <i>n</i> | Smoked in past year <i>n</i> | Tried to quit smoking in past year <i>n</i> | Total <i>n</i>                                  | Smoked in past year <i>n</i> | Tried to quit smoking in past year <i>n</i> | Total <i>n</i>                                  | Smoked in past year <i>n</i> | Tried to quit smoking in past year <i>n</i> |
| All ages, <i>n</i>           | 30,519         | 4481                         | 1558                                        | 20,582                                          | 2418                         | 848                                         | 9937                                            | 2063                         | 710                                         |
| Age in years, % ( <i>n</i> ) |                |                              |                                             |                                                 |                              |                                             |                                                 |                              |                                             |
| 16-19                        | 3.4 (778)      | 3.8 (129)                    | 5.0 (62)                                    | 3.3 (531)                                       | 3.9 (77)                     | 5.3 (36)                                    | 3.6 (247)                                       | 3.8 (52)                     | 4.8 (26)                                    |
| 20-24                        | 8.8 (1938)     | 11.6 (413)                   | 14.9 (192)                                  | 7.7 (1269)                                      | 12.6 (251)                   | 15.1 (113)                                  | 10.2 (669)                                      | 10.9 (162)                   | 14.8 (79)                                   |
| 25-29                        | 6.3 (1617)     | 8.3 (326)                    | 9.0 (132)                                   | 6.7 (1178)                                      | 9.4 (199)                    | 10.3 (82)                                   | 5.7 (439)                                       | 7.5 (127)                    | 8.0 (50)                                    |
| 30-34                        | 9.9 (2448)     | 13.7 (508)                   | 17.3 (225)                                  | 10.1 (1720)                                     | 13.7 (286)                   | 17 (125)                                    | 9.5 (728)                                       | 13.7 (222)                   | 17.6 (100)                                  |
| 35-39                        | 6.5 (1671)     | 7.7 (309)                    | 7.9 (117)                                   | 6.7 (1181)                                      | 7.6 (168)                    | 7.4 (61)                                    | 6.2 (490)                                       | 7.7 (141)                    | 8.3 (56)                                    |
| 40-44                        | 9.1 (2401)     | 10.8 (430)                   | 10.9 (154)                                  | 10.1 (1775)                                     | 11.2 (249)                   | 11.3 (89)                                   | 7.8 (626)                                       | 10.5 (181)                   | 10.6 (65)                                   |
| 45-49                        | 6.5 (1926)     | 6.4 (295)                    | 6.2 (106)                                   | 7.5 (1446)                                      | 6.4 (160)                    | 5.6 (54)                                    | 5.2 (480)                                       | 6.5 (135)                    | 6.6 (52)                                    |
| 50-54                        | 9.7 (2856)     | 8.9 (423)                    | 6.9 (118)                                   | 10.9 (2089)                                     | 9.7 (237)                    | 9.2 (76)                                    | 8.1 (767)                                       | 8.3 (186)                    | 5.3 (42)                                    |
| 55-59                        | 7.4 (2493)     | 8.1 (417)                    | 7.9 (143)                                   | 7.2 (1665)                                      | 6.8 (197)                    | 5.9 (59)                                    | 7.5 (828)                                       | 9.0 (220)                    | 9.4 (84)                                    |
| 60-64                        | 8.4 (2878)     | 6.8 (368)                    | 5.0 (96)                                    | 8.1 (1921)                                      | 6.5 (185)                    | 5.0 (49)                                    | 8.7 (957)                                       | 7.0 (183)                    | 5.1 (47)                                    |
| 65-69                        | 6.9 (2582)     | 5.5 (323)                    | 4.3 (98)                                    | 6.6 (1690)                                      | 4.6 (148)                    | 3.5 (43)                                    | 7.3 (892)                                       | 6.2 (175)                    | 4.8 (55)                                    |
| 70-74                        | 6.4 (2468)     | 4.2 (260)                    | 2.5 (65)                                    | 5.8 (1531)                                      | 3.5 (116)                    | 2.5 (35)                                    | 7.2 (937)                                       | 4.7 (144)                    | 2.4 (30)                                    |
| 75-79                        | 6.1 (2433)     | 2.7 (178)                    | 1.7 (37)                                    | 5.5 (1478)                                      | 2.7 (98)                     | 1.7 (20)                                    | 6.9 (955)                                       | 2.7 (80)                     | 1.8 (17)                                    |
| ≥80                          | 4.8 (2030)     | 1.4 (102)                    | 0.4 (13)                                    | 3.8 (1108)                                      | 1.2 (47)                     | 0.4 (6)                                     | 6.1 (922)                                       | 1.5 (55)                     | 0.4 (7)                                     |

Data are shown as weighted percentages and unweighted sample sizes.

## Supplementary File 2: additional results for women

**Table S3.** Observed age-specific estimates of smoking and quitting behaviours among women (≥16y) in Great Britain

|                          | % [95% CI]                      |                                |                                            |                                |
|--------------------------|---------------------------------|--------------------------------|--------------------------------------------|--------------------------------|
|                          | Smoking prevalence <sup>1</sup> | Quit attempt rate <sup>2</sup> | Success rate of quit attempts <sup>3</sup> | Overall quit rate <sup>2</sup> |
| Age (years) <sup>4</sup> |                                 |                                |                                            |                                |
| 16-19                    | 16.1 [13.0–19.1]                | 47.4 [37.7–57.1]               | 24.3 [12.2–36.4]                           | 14.9 [7.5–22.3]                |
| 20-24                    | 17.0 [15.1–18.9]                | 47.4 [41.9–52.9]               | 33.5 [25.9–41.0]                           | 22.8 [18.2–27.4]               |
| 25-29                    | 17.7 [15.5–19.8]                | 40.6 [34.6–46.7]               | 34.6 [25.6–43.6]                           | 19.8 [15.1–24.5]               |
| 30-34                    | 18.8 [17.0–20.6]                | 47.3 [42.3–52.3]               | 29.1 [22.6–35.7]                           | 19.0 [15.2–22.7]               |
| 35-39                    | 15.8 [13.7–17.8]                | 39.1 [32.8–45.4]               | 29.9 [20.5–39.3]                           | 19.8 [14.9–24.7]               |
| 40-44                    | 17.0 [15.2–18.7]                | 37.7 [32.4–42.9]               | 25.6 [18.0–33.1]                           | 14.0 [10.4–17.6]               |
| 45-49                    | 14.8 [12.9–16.7]                | 35.6 [29.3–41.8]               | 19.3 [11.6–27.0]                           | 10.6 [7.1–14.2]                |
| 50-54                    | 13.7 [12.3–15.2]                | 29.0 [24.1–33.9]               | 17.1 [9.9–24.3]                            | 10.6 [7.4–13.7]                |
| 55-59                    | 16.0 [14.3–17.8]                | 37.3 [31.8–42.8]               | 21.6 [14.1–29.2]                           | 12.5 [9.0–16.0]                |
| 60-64                    | 12.3 [10.9–13.7]                | 28.0 [22.6–33.4]               | 21.6 [12.8–30.4]                           | 8.9 [5.8–11.9]                 |
| 65-69                    | 11.8 [10.4–13.3]                | 29.1 [23.6–34.7]               | 21.8 [12.9–30.8]                           | 11.1 [7.5–14.8]                |
| 70-74                    | 9.7 [8.4–11.1]                  | 22.8 [17.1–28.6]               | 16.2 [6.5–25.9]                            | 10.6 [6.3–14.9]                |
| 75-79                    | 6.9 [5.6–8.1]                   | 25.3 [16.8–33.8]               | 9.6 [0.4–18.7]                             | 8.5 [3.7–13.3]                 |
| ≥80                      | 4.8 [3.8–5.8]                   | 11.3 [4.8–17.8]                | 3.6 [0.0–10.8]                             | 1.5 [0.0–3.4]                  |

CI, confidence interval.

<sup>1</sup> Among women.

<sup>2</sup> Among women who smoked in the past year.

<sup>3</sup> Among women who tried to quit smoking in the past year.

<sup>4</sup> Observed weighted estimates within age bands. Sample sizes are provided in **Table S2**; note small denominators for some estimates (e.g., quitting outcomes in older age bands).

# Supplementary File 2: additional results for women

**Table S4.** Observed age-specific estimates of smoking and quitting behaviours by socioeconomic position among women (≥16y) in Great Britain

| Occupational social grade <sup>4</sup> | % [95% CI]                      |                  |                                |                  |                                            |                  |                                |                  |
|----------------------------------------|---------------------------------|------------------|--------------------------------|------------------|--------------------------------------------|------------------|--------------------------------|------------------|
|                                        | Smoking prevalence <sup>1</sup> |                  | Quit attempt rate <sup>2</sup> |                  | Success rate of quit attempts <sup>3</sup> |                  | Overall quit rate <sup>2</sup> |                  |
|                                        | ABC1                            | C2DE             | ABC1                           | C2DE             | ABC1                                       | C2DE             | ABC1                           | C2DE             |
| Age (years) <sup>5</sup>               |                                 |                  |                                |                  |                                            |                  |                                |                  |
| 16-19                                  | 13.5 [10.4–16.6]                | 19.1 [13.7–24.6] | 49.0 [37.2–60.9]               | 46.2 [31.7–60.7] | 21.2 [7.2–35.2]                            | 26.8 [8.2–45.4]  | 10.3 [3.3–17.3]                | 18.5 [6.7–30.2]  |
| 20-24                                  | 16.3 [14.1–18.5]                | 17.7 [14.6–20.8] | 44.7 [38.0–51.4]               | 49.6 [41.3–57.9] | 37.1 [27.4–46.9]                           | 30.8 [19.8–41.7] | 19.6 [14.3–24.9]               | 25.4 [18.2–32.7] |
| 25-29                                  | 13.6 [11.5–15.6]                | 24.0 [19.7–28.4] | 41.4 [34.0–48.8]               | 40.0 [30.7–49.3] | 37.3 [26.2–48.5]                           | 32.0 [18.1–46.0] | 21.5 [15.4–27.5]               | 18.3 [11.3–25.3] |
| 30-34                                  | 13.3 [11.6–15.0]                | 26.5 [22.9–30.0] | 46.2 [39.9–52.4]               | 48.1 [40.8–55.4] | 32.2 [23.6–40.9]                           | 26.9 [17.6–36.3] | 21.3 [16.2–26.3]               | 17.3 [12.0–22.7] |
| 35-39                                  | 11.2 [9.3–13.1]                 | 22.2 [18.2–26.3] | 36.7 [28.9–44.6]               | 40.8 [31.6–50.0] | 29.7 [17.6–41.7]                           | 30.1 [16.7–43.5] | 20.8 [14.3–27.3]               | 19.1 [12.1–26.2] |
| 40-44                                  | 11.5 [9.9–13.1]                 | 26.3 [22.5–30.0] | 37.6 [31.1–44.2]               | 37.7 [29.9–45.6] | 30.2 [20.2–40.2]                           | 22.0 [11.1–32.9] | 16.6 [11.7–21.6]               | 11.9 [6.9–17.0]  |
| 45-49                                  | 8.8 [7.3–10.4]                  | 26.1 [21.7–30.5] | 32.2 [24.4–40.1]               | 38.0 [28.9–47.1] | 32.3 [18.8–45.8]                           | 11.4 [3.0–19.8]  | 16.6 [10.4–22.8]               | 6.4 [2.3–10.4]   |
| 50-54                                  | 9.6 [8.3–11.0]                  | 21.0 [17.8–24.1] | 35.3 [28.6–42.0]               | 23.7 [16.8–30.7] | 21.3 [11.2–31.4]                           | 11.7 [2.0–21.5]  | 13.1 [8.4–17.8]                | 8.4 [4.2–12.6]   |
| 55-59                                  | 10.2 [8.6–11.8]                 | 23.3 [20.0–26.6] | 32.3 [25.0–39.5]               | 40.2 [32.6–47.7] | 22.7 [11.3–34.2]                           | 21.1 [11.4–30.9] | 12.8 [7.7–17.8]                | 12.4 [7.6–17.1]  |
| 60-64                                  | 8.7 [7.3–10.1]                  | 16.6 [14.0–19.3] | 28.5 [21.3–35.6]               | 27.7 [20.0–35.3] | 28.8 [15.1–42.5]                           | 16.5 [5.3–27.7]  | 12.7 [7.5–17.8]                | 6.2 [2.7–9.8]    |
| 65-69                                  | 7.5 [6.1–8.9]                   | 17.0 [14.2–19.7] | 30.0 [21.6–38.3]               | 28.7 [21.5–35.9] | 23.8 [10.6–36.9]                           | 20.8 [9.0–32.6]  | 12.2 [6.9–17.4]                | 10.5 [5.7–15.4]  |
| 70-74                                  | 6.3 [5.0–7.7]                   | 13.3 [10.9–15.7] | 27.0 [18.2–35.8]               | 20.5 [13.1–27.9] | 18.2 [3.0–33.3]                            | 14.8 [2.3–27.3]  | 16.1 [8.4–23.8]                | 7.6 [2.5–12.7]   |
| 75-79                                  | 6.0 [4.7–7.3]                   | 7.8 [5.7–9.8]    | 23.4 [13.6–33.2]               | 26.8 [13.7–39.8] | 4.4 [0.0–10.6]                             | 13.2 [0.0–28.3]  | 4.4 [0.6–8.2]                  | 11.5 [3.6–19.4]  |
| ≥80                                    | 4.1 [2.8–5.3]                   | 5.4 [3.8–7.0]    | 12.9 [2.2–23.7]                | 10.3 [2.3–18.4]  | 0.0 [0.0–0.0]                              | 6.4 [0.0–19.1]   | 0.0 [0.0–0.0]                  | 2.5 [0.0–5.5]    |

CI, confidence interval.

<sup>1</sup> Among women.

<sup>2</sup> Among women who smoked in the past year.

<sup>3</sup> Among women who tried to quit smoking in the past year.

<sup>4</sup> Occupational social grades ABC1 = more advantaged, C2DE = less advantaged.

<sup>5</sup> Observed weighted estimates within age bands. Sample sizes are provided in **Table S2**; note small denominators for some estimates (e.g., quitting outcomes in older age bands).
